# Supplementary material for: Spectrum-Effect Relationships between High-Performance Liquid Chromatography (HPLC) Fingerprints and the Antioxidant and Anti-Inflammatory Activities of Collagen Peptides
Source: PubMed Central journal article supplement (PMC6320860; doi:10.3390/molecules23123257), 2018-12-10
Supplement: molecules-23-03257-s001.pdf [file molecules-23-03257-s001.pdf]

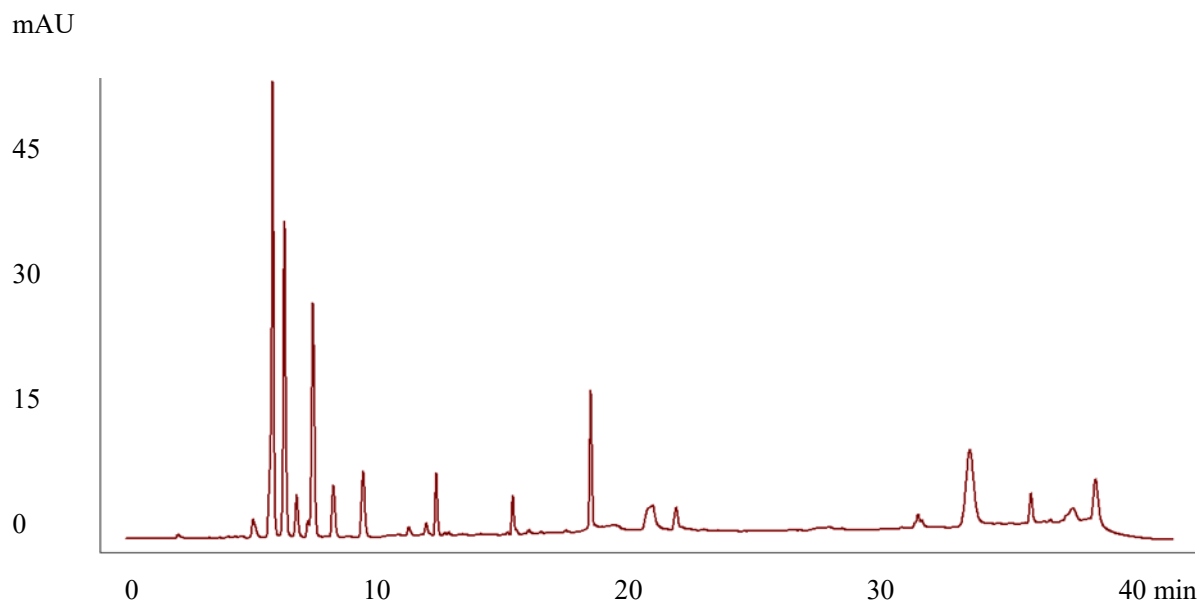

**Figure S1.** The HPLC fingerprints of collagen peptide sample S1

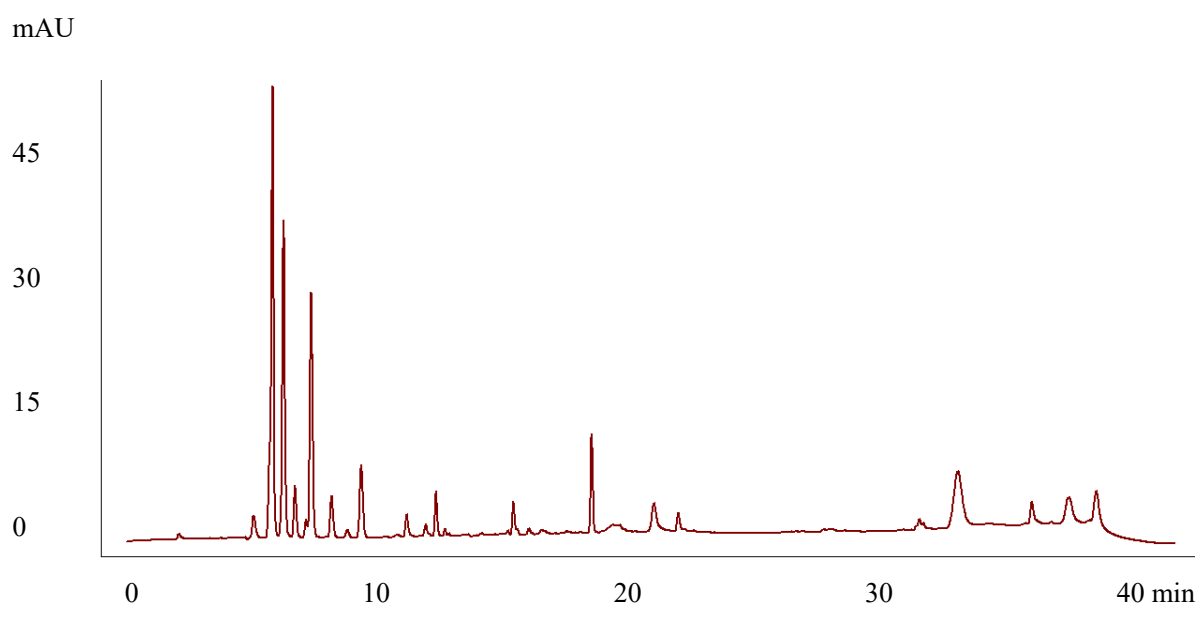

**Figure S2.** The HPLC fingerprints of collagen peptide sample S2

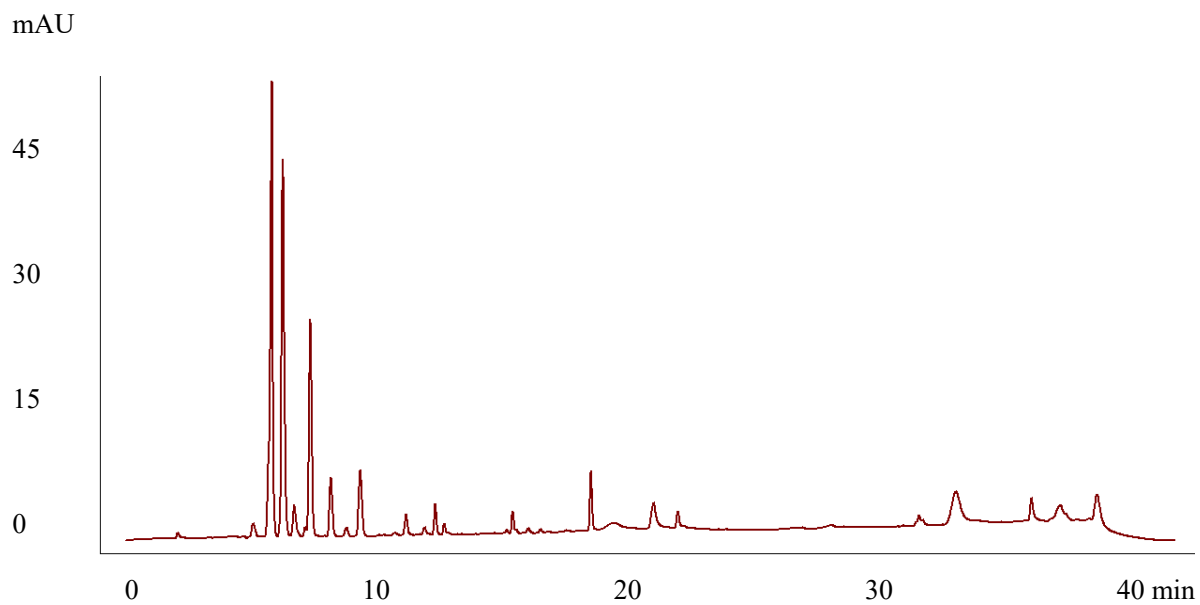

**Figure S3.** The HPLC fingerprints of collagen peptide sample S3

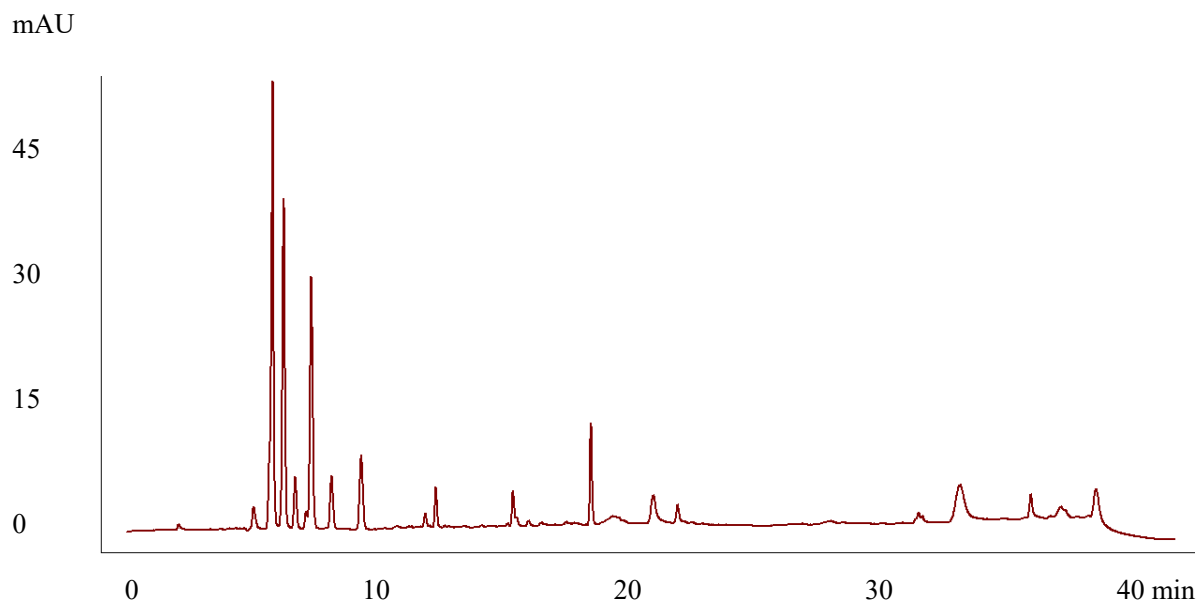

**Figure S4.** The HPLC fingerprints of collagen peptide sample S4

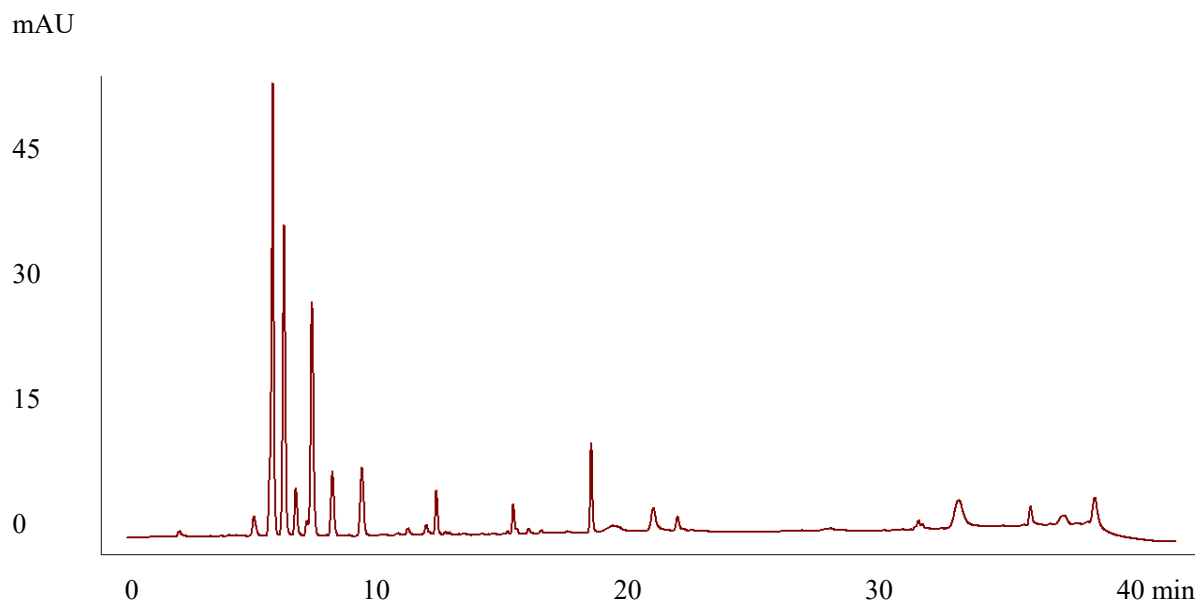

**Figure S5.** The HPLC fingerprints of collagen peptide sample S5

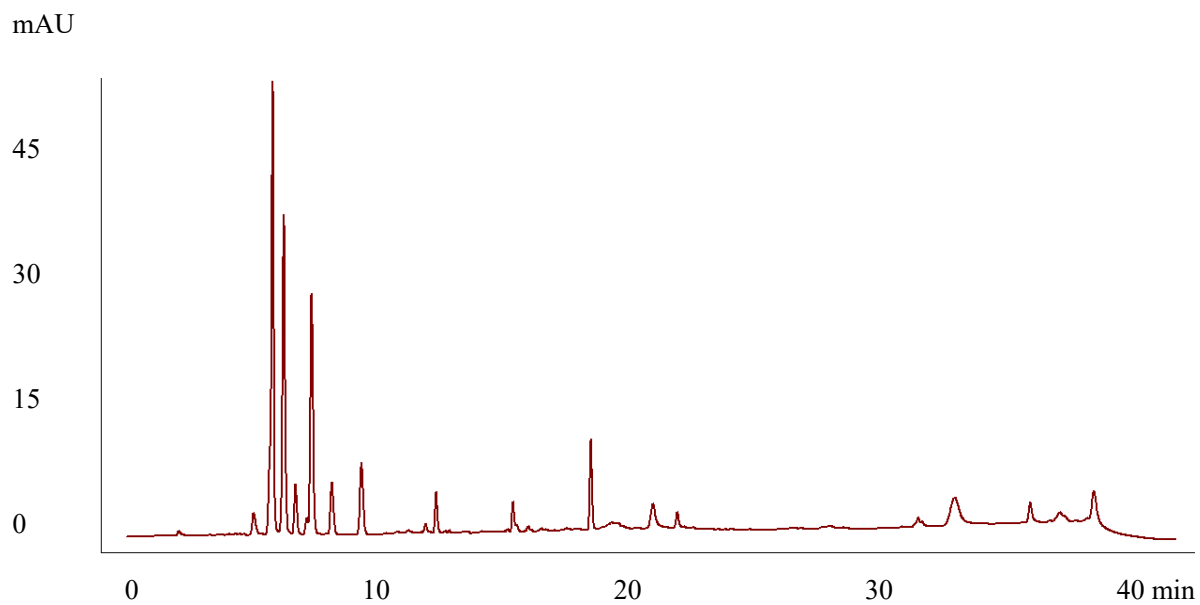

**Figure S6.** The HPLC fingerprints of collagen peptide sample S6

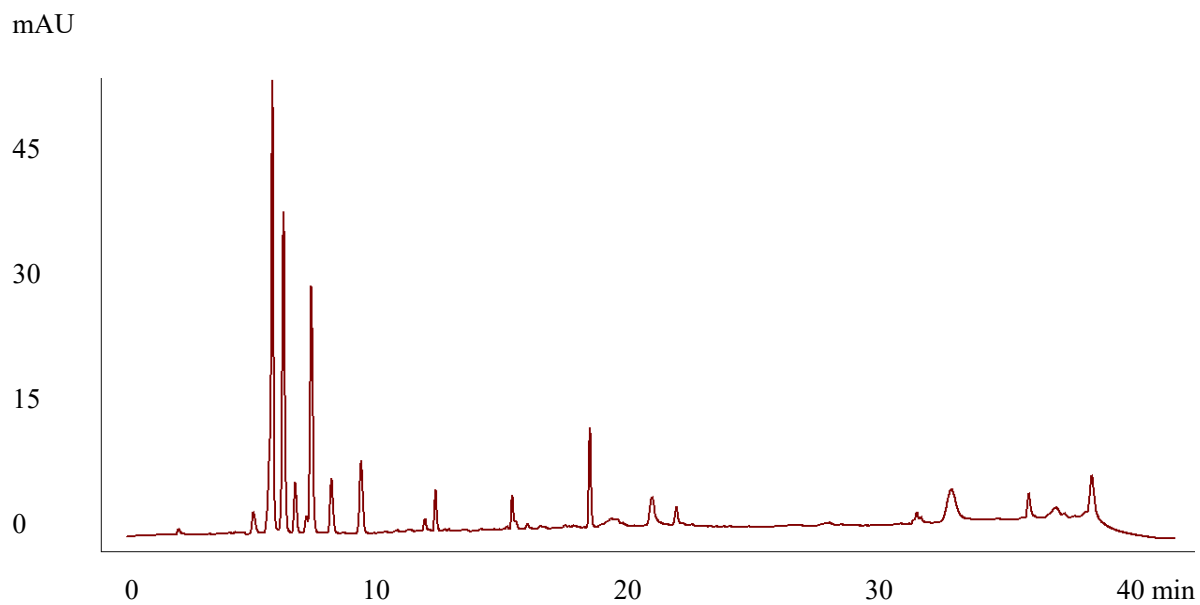

**Figure S7.** The HPLC fingerprints of collagen peptide sample S7

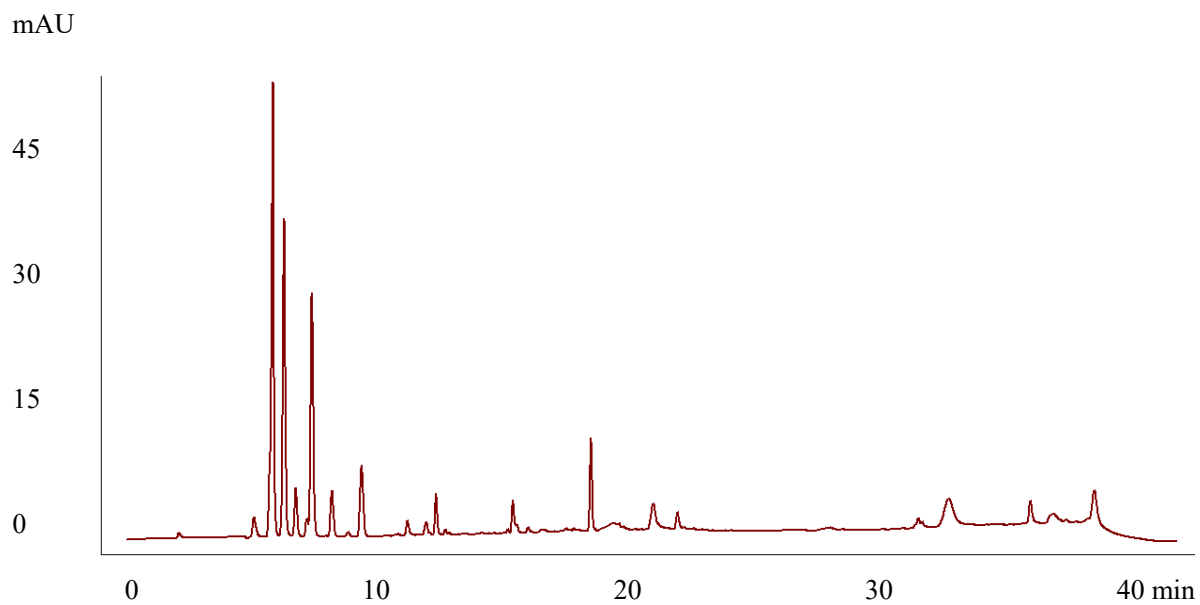

**Figure S8.** The HPLC fingerprints of collagen peptide sample S8



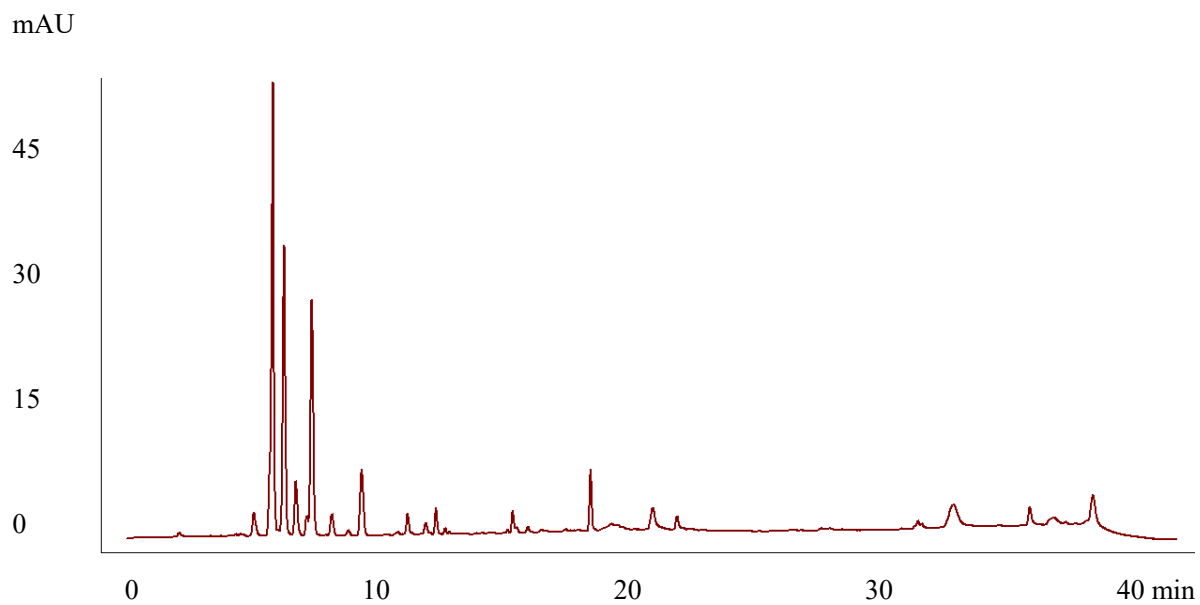

**Figure S9.** The HPLC fingerprints of collagen peptide sample S9

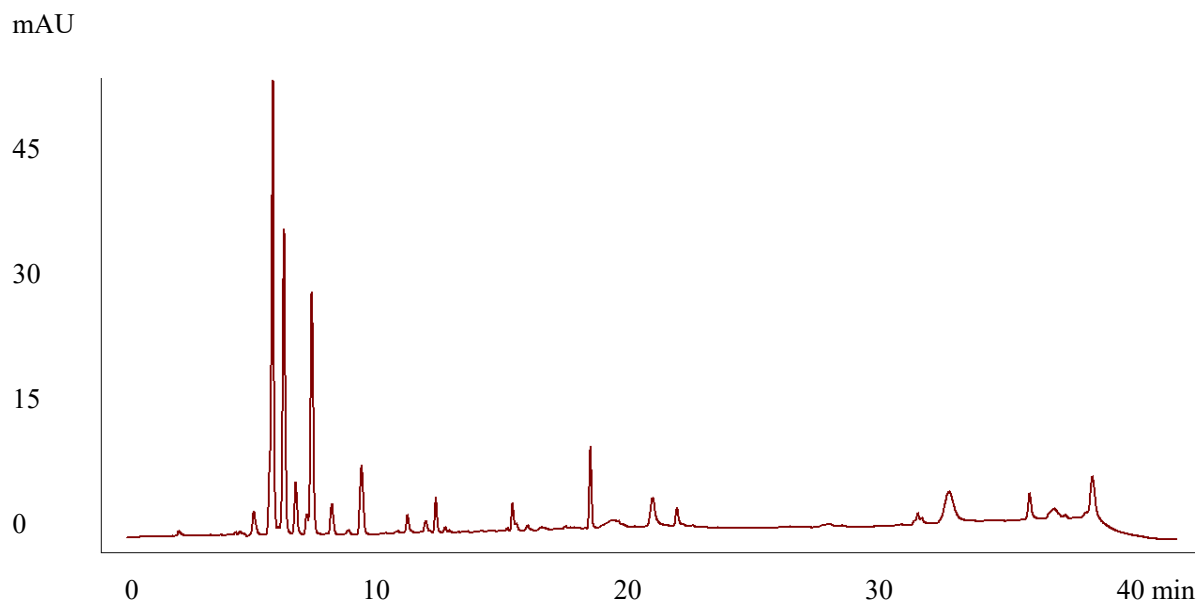

**Figure S10.** The HPLC fingerprints of collagen peptide sample S10

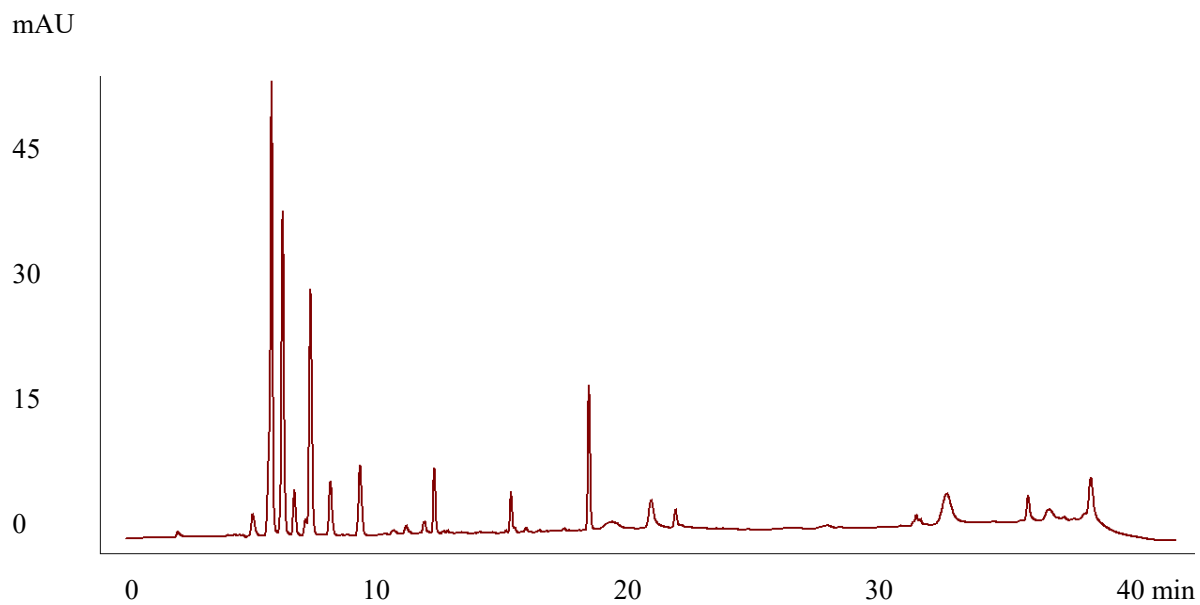

**Figure S11.** The HPLC fingerprints of collagen peptide sample S11

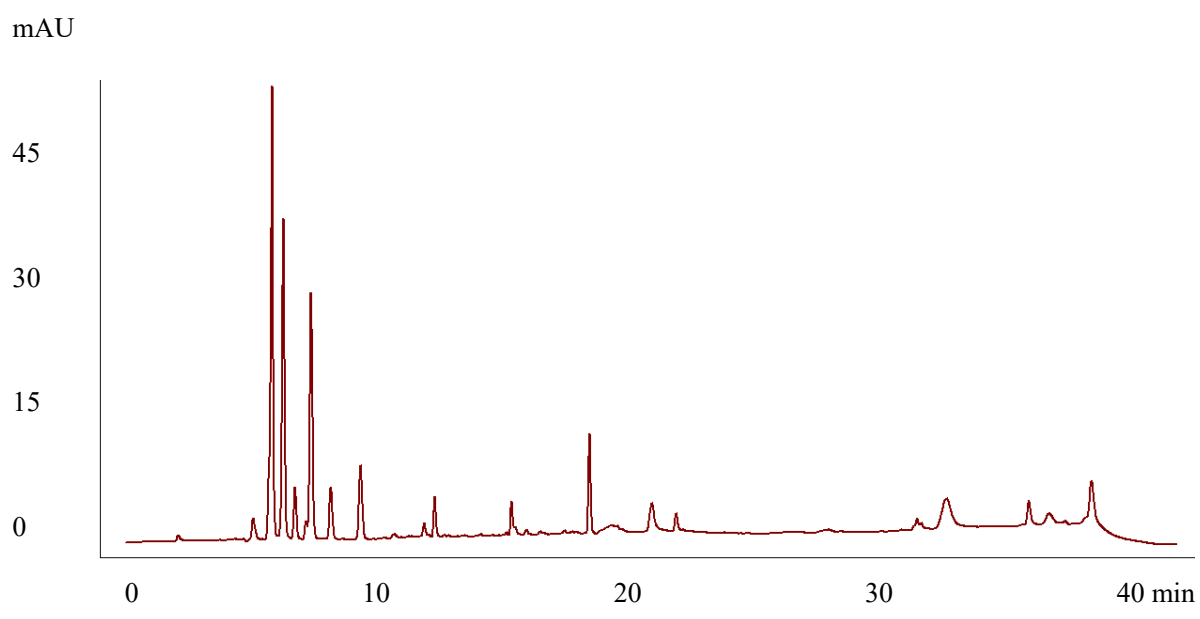

**Figure S12.** The HPLC fingerprints of collagen peptide sample S12

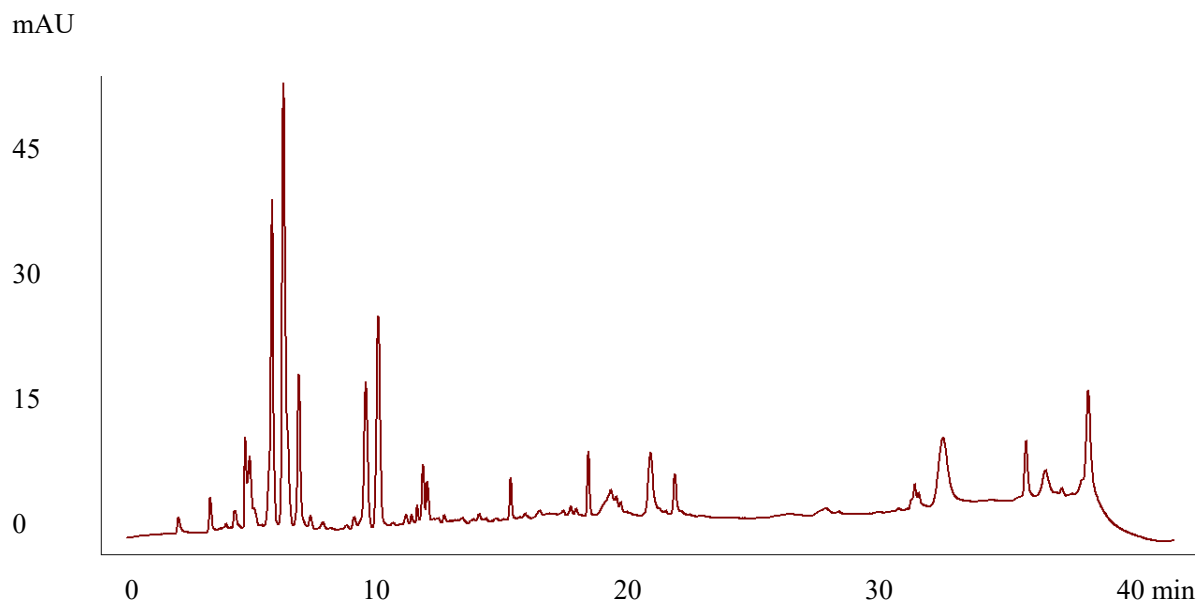

**Figure S13.** The HPLC fingerprints of collagen peptide sample S13
